# Supplementary material for: In situ ion exchange synthesis of MoS2/g-C3N4 heterojunctions for highly efficient hydrogen production
Source: Royal Society of Chemistry journal article supplement (doi:10.1039/c7nj03483k), 2017-11-28
Supplement: c7nj03483k1.pdf [file c7nj03483k1.pdf]

## Supporting Information

### ***In situ* ion exchange synthesis of MoS<sub>2</sub>/g-C<sub>3</sub>N<sub>4</sub> heterojunction for highly efficient hydrogen production**

Min Wang,<sup>a, b, 1</sup> Peng Ju,<sup>d, 1</sup> Yun Zhao,<sup>a, b</sup> Jiajia Li,<sup>a, b</sup> Xiuxun Han<sup>a, c, \*</sup> and Zhaomin Hao<sup>e</sup>

<sup>a</sup> Laboratory of Clean Energy Chemistry and Materials, Lanzhou Institute of Chemical Physics, Chinese Academy of Sciences, 18 Tianshui Middle Road, Lanzhou 730000, PR China

<sup>b</sup> University of Chinese Academy of Sciences, 19 (Jia) Yuquan Road, Beijing 100039, PR China

<sup>c</sup> Qingdao Center of Resource Chemistry & New Materials, 36 Jinshui Road, Qingdao 266100, PR China

<sup>d</sup> Marine Ecology Center, The First Institute of Oceanography, State Oceanic Administration, 6 Xianxialing Road, Qingdao 266061, PR China

<sup>e</sup> Henan University, 85 Minglun Road, Kaifeng 410200, PR China

\* Corresponding author

Tel.: +86-931-4968054; Fax: +86-931-4968054

E-mail: xxhan@licp.cas.cn (X. Han)

<sup>1</sup> These two authors contributed equally to this work.

**Table S1** MoS<sub>2</sub> loading amount in MoS<sub>2</sub>/CNNS samples determined by ICP-AES.

|                            | Composite (g L <sup>-1</sup> ) | Mo (mg L <sup>-1</sup> ) | S (mg L <sup>-1</sup> ) | MoS <sub>2</sub> /composite (wt%) |
|----------------------------|--------------------------------|--------------------------|-------------------------|-----------------------------------|
| MoS <sub>2</sub> /CNNS(15) | 1.0                            | 12.2                     | 8.2                     | 2.0                               |
| MoS <sub>2</sub> /CNNS(20) | 1.0                            | 23.9                     | 15.5                    | 3.9                               |
| MoS <sub>2</sub> /CNNS(30) | 1.0                            | 34.7                     | 22.3                    | 5.7                               |
| MoS <sub>2</sub> /CNNS(50) | 1.0                            | 34.9                     | 22.5                    | 5.7                               |

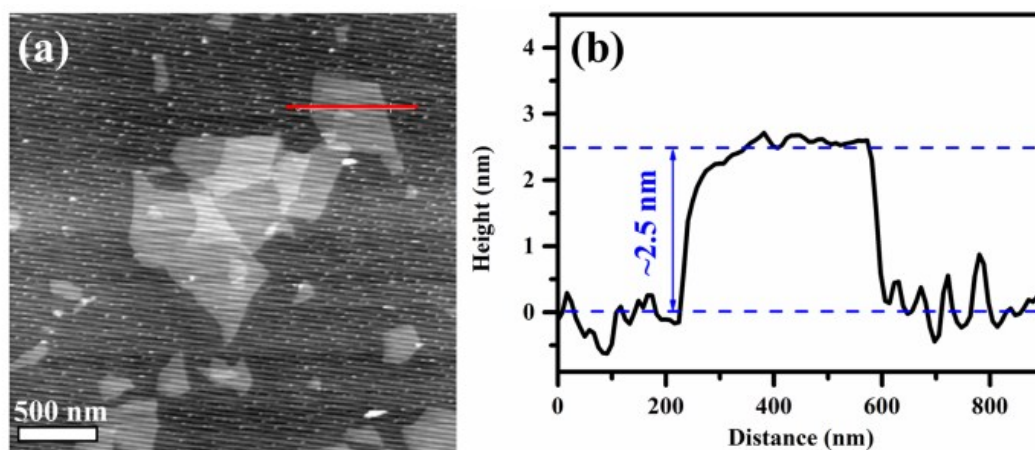

**Fig. S1** (a) AFM image of CNNS deposited on the silicon wafer substrate, (b) The corresponding height curve determined along the red line in (a).

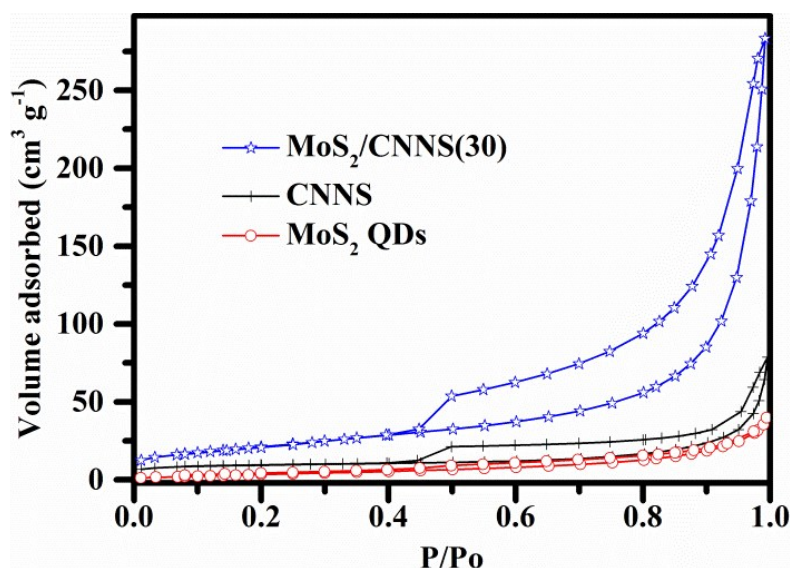

**Fig. S2** N<sub>2</sub> adsorption/desorption isotherm curves of MoS<sub>2</sub> QDs, CNNS, and MoS<sub>2</sub>/CNNS(30).

The calculations of BET specific surface area were based on N<sub>2</sub> adsorption/desorption isotherm curves of MoS<sub>2</sub> QDs, CNNS and the MoS<sub>2</sub>/CNNS(30) composite, as shown in Fig. S2. MoS<sub>2</sub> QDs possess a small surface area (29.15 m<sup>2</sup> g<sup>-1</sup>) due to aggregation, while the MoS<sub>2</sub>/CNNS(30) composite shows the larger specific surface area (78.95 m<sup>2</sup> g<sup>-1</sup>).

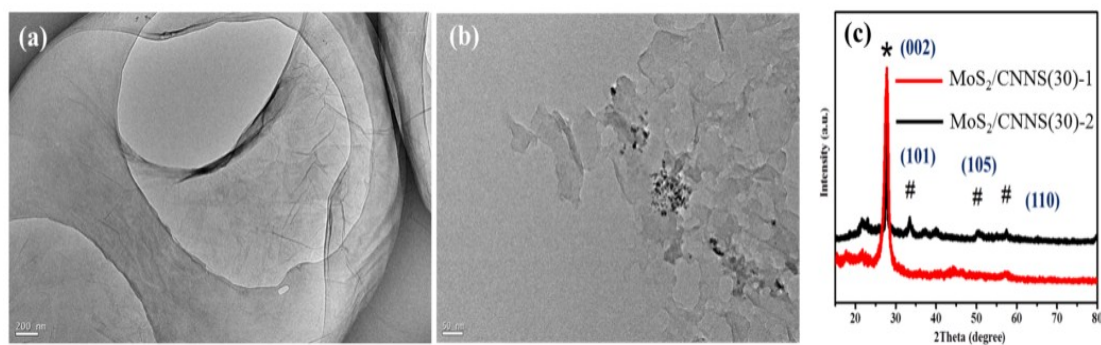

**Fig. S3** TEM images of (a) MoS<sub>2</sub>/CNNS(30)-1 and (b) MoS<sub>2</sub>/CNNS(30)-2; (c) XRD patterns of MoS<sub>2</sub>/CNNS(30)-1 and MoS<sub>2</sub>/CNNS(30)-2.

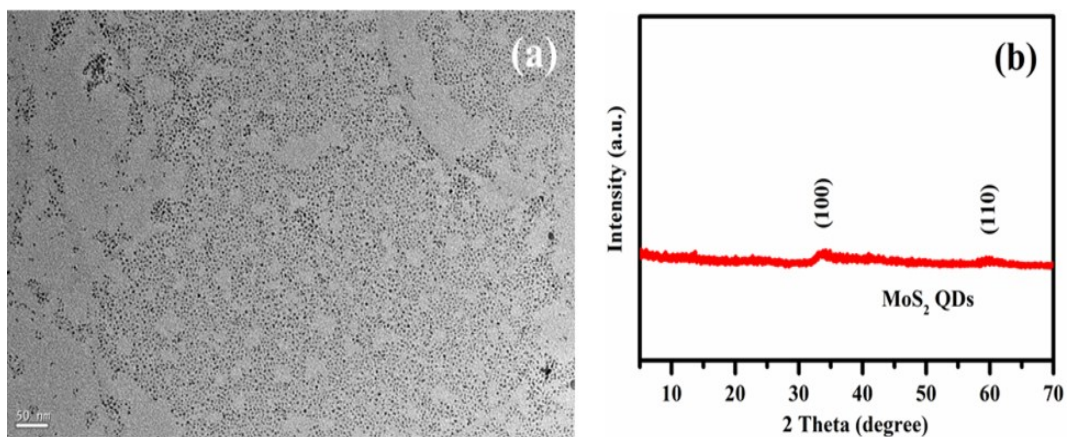

**Fig. S4** (a) TEM image and (b) XRD pattern of MoS<sub>2</sub> QDs.

MoS<sub>2</sub> QDs were characterized by means of TEM and XRD. A typical TEM image of the MoS<sub>2</sub> QDs (Fig. S4a) shows highly uniform and monodisperse nanocrystals in narrow distribution of  $2.15 \pm 0.34$  nm in diameter (the size is statistically calculated from more than 100 QDs in the TEM images). It can be seen in Fig. S4b that two major diffraction peaks can be clearly observed in the XRD pattern of MoS<sub>2</sub> QDs, which can be attributed to the (100) and (110) planes of MoS<sub>2</sub>, respectively. Moreover, it can be seen that the peak intensity is weak, implying the poor crystalline of MoS<sub>2</sub> QDs. These results are in good agreement with the morphology and phase structure of MoS<sub>2</sub> QDs in MoS<sub>2</sub>/CNNS composites.

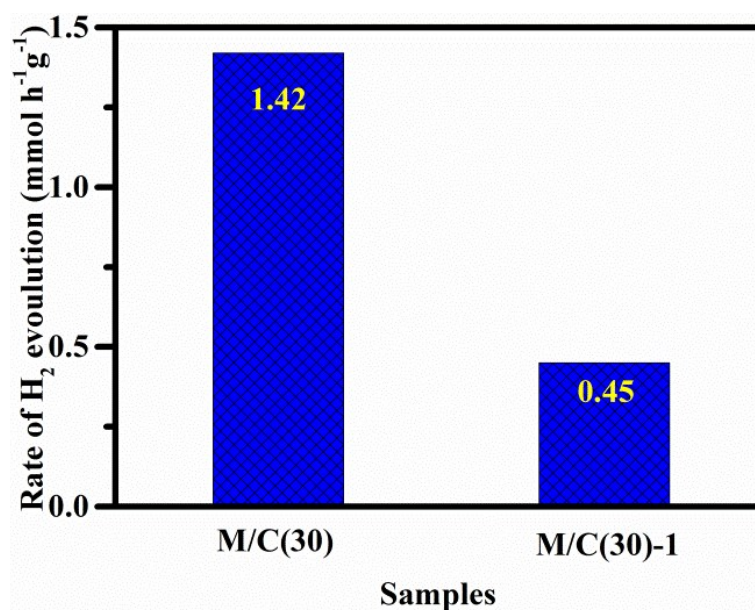

**Fig. S5** Photocatalytic H<sub>2</sub> production rates of MoS<sub>2</sub>/CNNS (30) and MoS<sub>2</sub>/CNNS (30)-1.

**Table S2** Comparison of the photocatalytic performance of MoS<sub>2</sub>/CNNS prepared by ion exchange process and MoS<sub>2</sub>/C<sub>3</sub>N<sub>4</sub> photocatalysts reported previously.

| Photocatalyst                                                             | Light source                   | Concentration of photocatalysts (g L <sup>-1</sup> ) | H <sub>2</sub> evolution (μmol h <sup>-1</sup> g <sup>-1</sup> ) | Ref.      |
|---------------------------------------------------------------------------|--------------------------------|------------------------------------------------------|------------------------------------------------------------------|-----------|
| 0.2 wt% MoS <sub>2</sub> /mpg-CN<br>(+1 wt% Pt)                           | 300 W Xe lamp<br>(λ > 420 nm)  | 0.2                                                  | 1250                                                             | 1         |
| 0.5 wt% MoS <sub>2</sub> /g-CN<br>(+5 wt% Pt)                             | 300 W Xe lamp<br>(λ > 400 nm)  | 0.8 g                                                | 231                                                              | 2         |
| 2.89 wt% MoS <sub>2</sub> /g-C <sub>3</sub> N <sub>4</sub><br>(+5 wt% Pt) | 300 W Xe lamp<br>(λ > 400 nm)  | 1.0 g                                                | 252                                                              | 3         |
| 1 wt% MoS <sub>2</sub> QDs/CN<br>(+1 wt% Pt)                              | 300 W Xe lamp<br>(λ > 420 nm)  | 0.5 g                                                | 393                                                              | 4         |
| 0.5 wt% MoS <sub>2</sub> /HCNS<br>(+1 wt% Pt)                             | 300 W Xe lamp<br>(λ > 420 nm)  | 0.2 g                                                | 1340                                                             | 5         |
| 5.7 wt% MoS <sub>2</sub> /CNNS<br>(without Pt)                            | Simulated Sunlight<br>(AM1.5G) | 0.5 g                                                | 1420                                                             | This work |

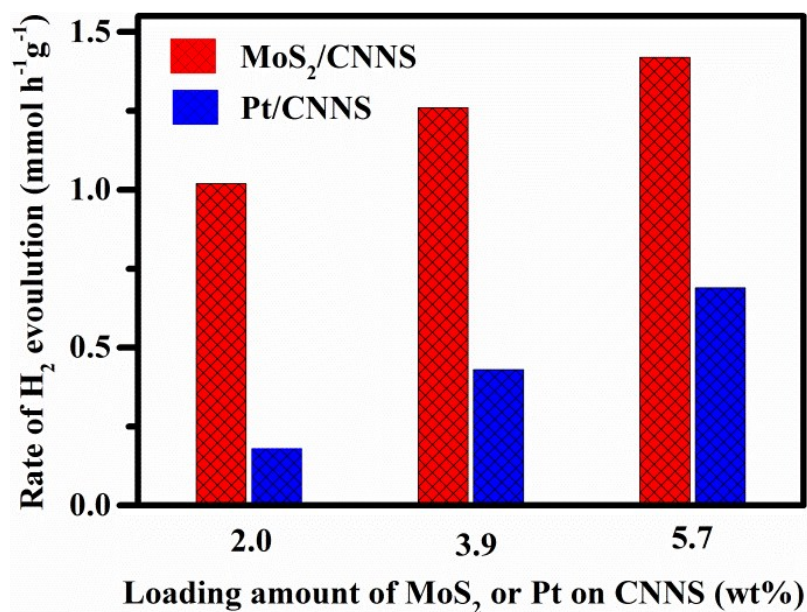

**Fig. S6** The H<sub>2</sub> production rate of CNNS loaded with different amounts of MoS<sub>2</sub> or Pt.

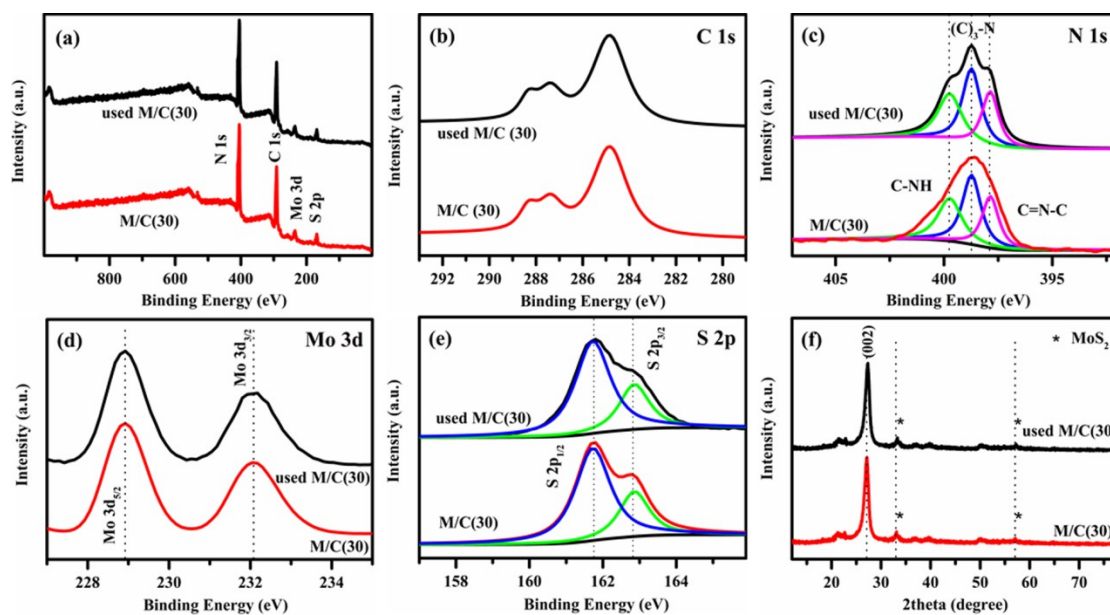

**Fig. S7** (a) XPS spectrum, high resolution XPS spectra of (b) C 1s, (c) N 1s, (d) Mo 3d, and (e) S 2p, and (f) XRD patterns of MoS<sub>2</sub>/CNNS(30) before and after reaction.

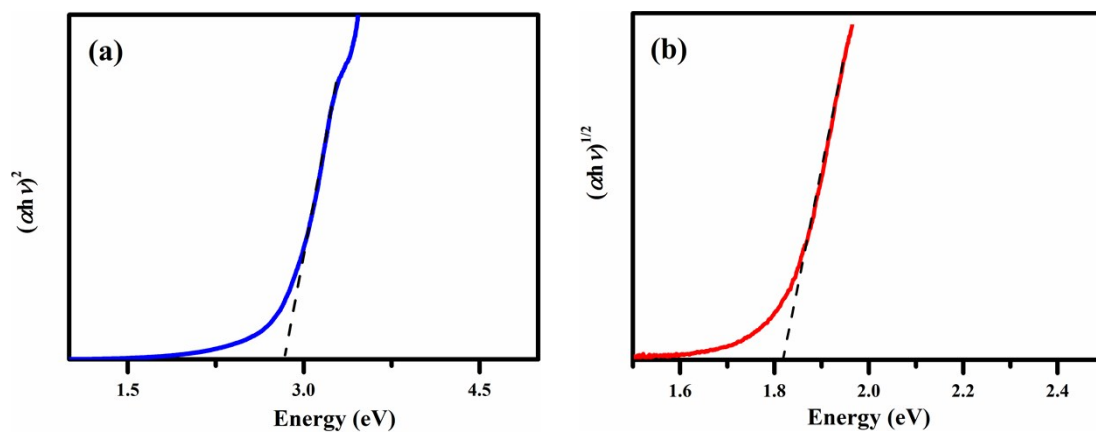

**Fig. S8** Tauc plots of (a) CNNS and (b) MoS<sub>2</sub> QDs.

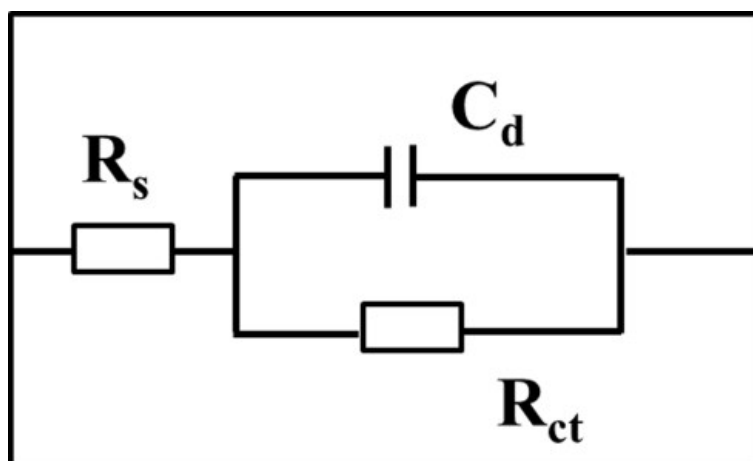

**Fig. S9** The equivalent electric circuit used for fitting the EIS experiment results in Fig. 5b.

**Table S3** Parameters used to fit the experimental impedance data in Fig. S8.

|                            | $R_s$ ( $\Omega$ ) | $C_d$ (F) | $R_{ct}$ ( $\Omega$ ) |
|----------------------------|--------------------|-----------|-----------------------|
| CNNS                       | 16.83              | 16        | 17 585                |
| MoS <sub>2</sub> QDs       | 16.83              | 12        | 12 698                |
| MoS <sub>2</sub> /CNNS(30) | 16.83              | 46        | 2 395                 |

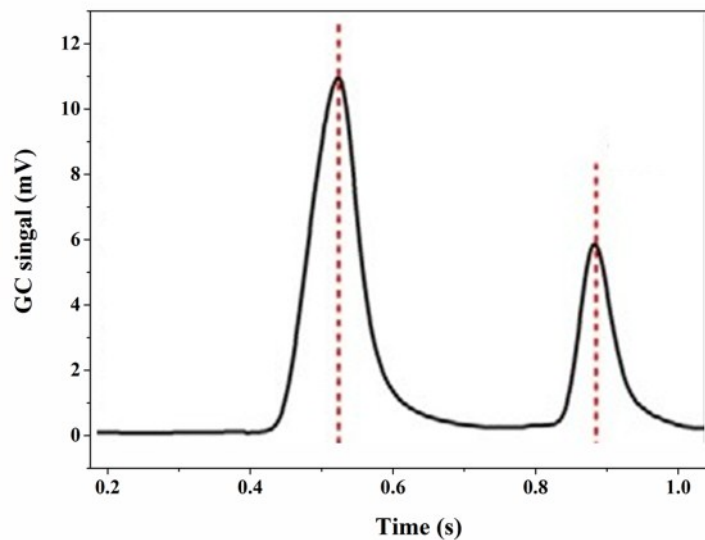

**Fig. S10** The typical signal detected in the photocatalytic test.

As shown in Fig. S10, H<sub>2</sub> ( $t_1 = 0.523$  s) and O<sub>2</sub> ( $t_2 = 0.890$  s) can be detected in our photocatalytic test simultaneously.

## References

- 1 Y. Hou, A. B. Laursen, J. Zhang, G. Zhang, Y. Zhu, X. Wang, S. Dahl and I. Chorkendorff, *Angew. Chem. Int. Ed.*, 2013, **52**, 1.
- 2 L. Ge, C. Han, X. Xiao and L. Guo, *Int. J. Hydrogen Energy*, 2013, **38**, 6960.
- 3 H. Zhao, Y. Dong, P. Jiang, H. Miao, G. Wang and J. Zhang, *J. Mater. Chem. A*, 2015, **3**, 7375.
- 4 X. Jin, X. Fan, J. Tian, R. Cheng, M. Li and L. Zhang, *RSC Adv.*, 2016, **6**, 52611.
- 5 D. Zheng, G. Zhang, Y. Hou and X. Wang, *Appl. Catal. A: Gen.*, 2016, **521**, 2.
